# Supplementary material
Source: Frontiers journal article supplement (https://www.frontiersin.org/articles/230898)

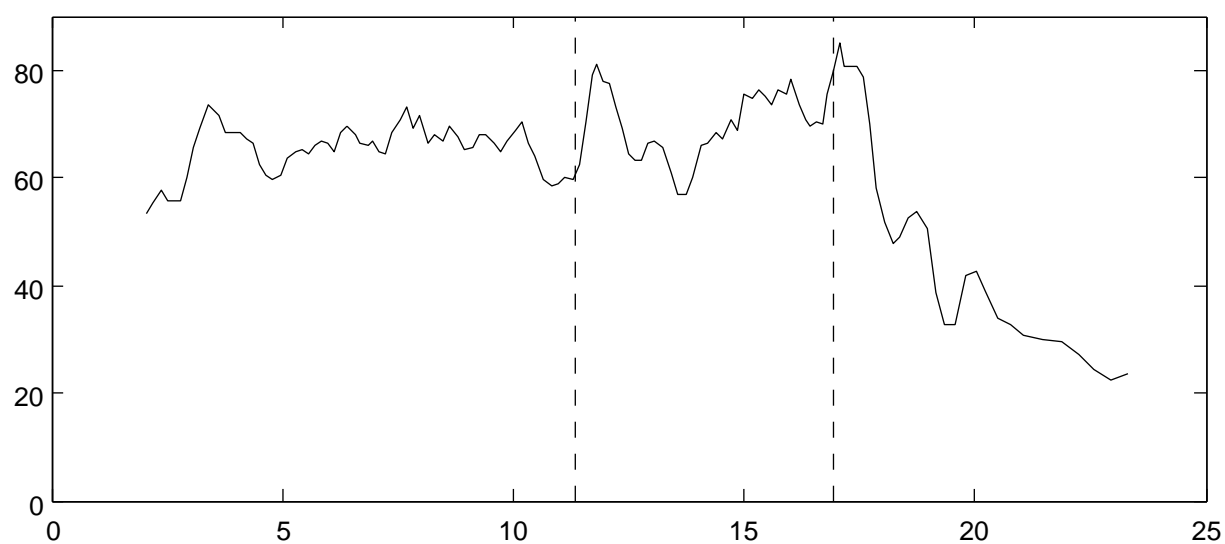

Supplement: Data_Sheet_2.ZIP [file Data_Sheet_2.ZIP]

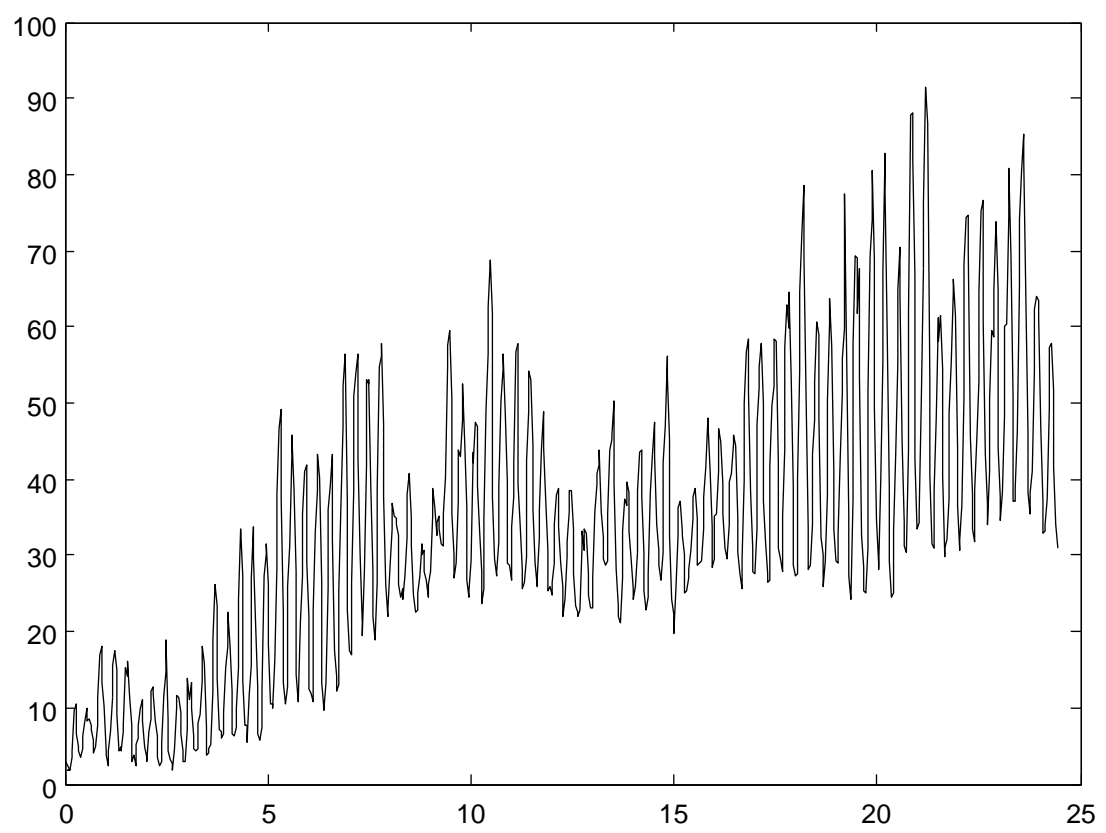

Supplement: Data_Sheet_2.ZIP [file Data_Sheet_2.ZIP]

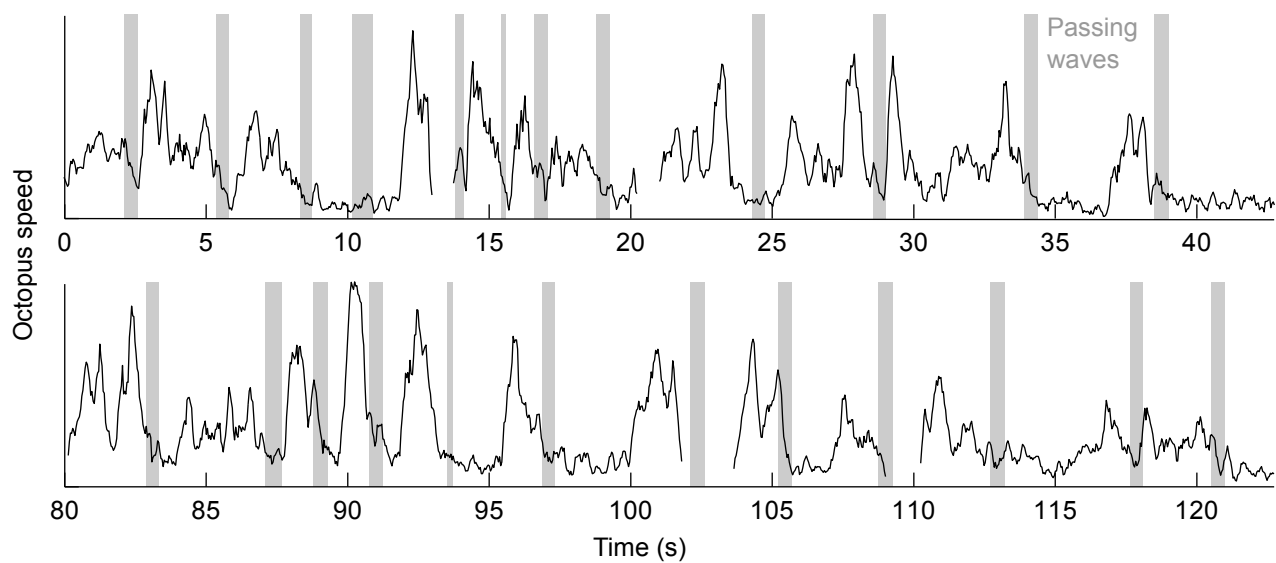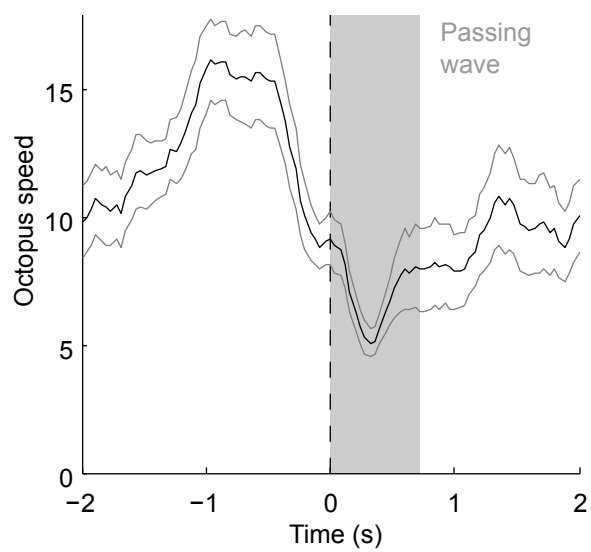

Supplement: Data_Sheet_2.ZIP [file Data_Sheet_2.ZIP]

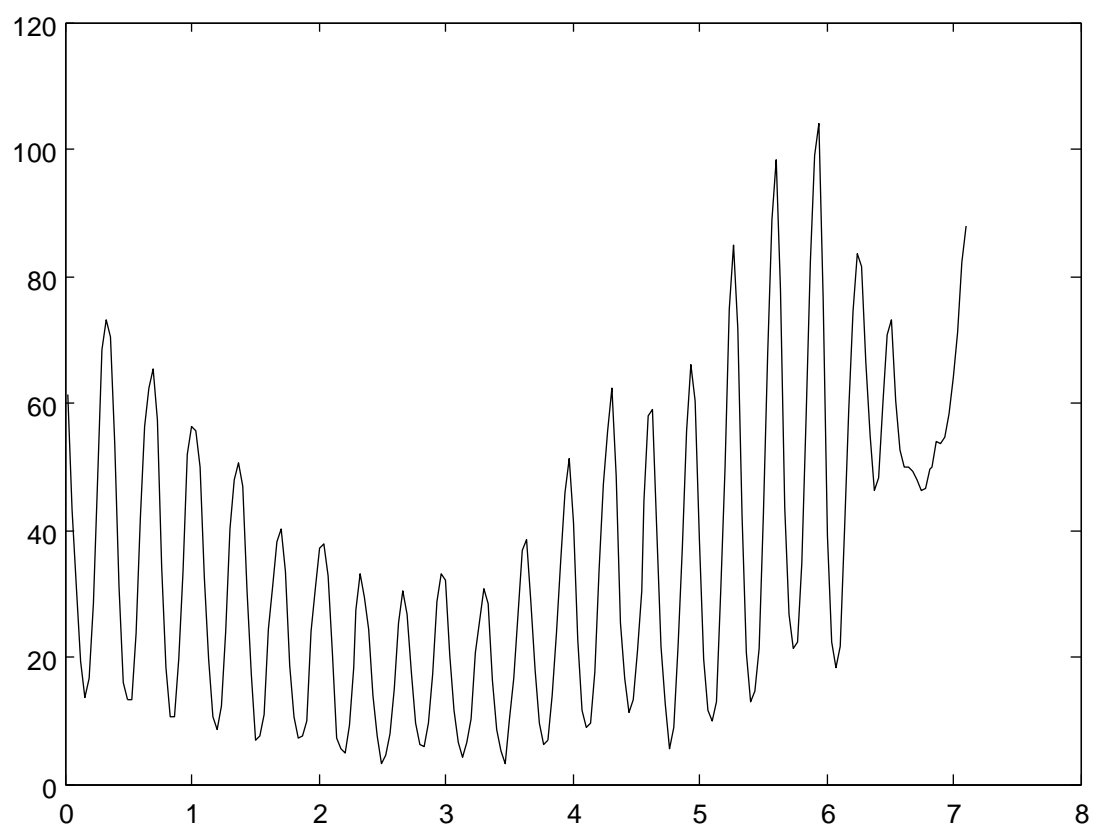

Supplement: Data_Sheet_2.ZIP [file Data_Sheet_2.ZIP]

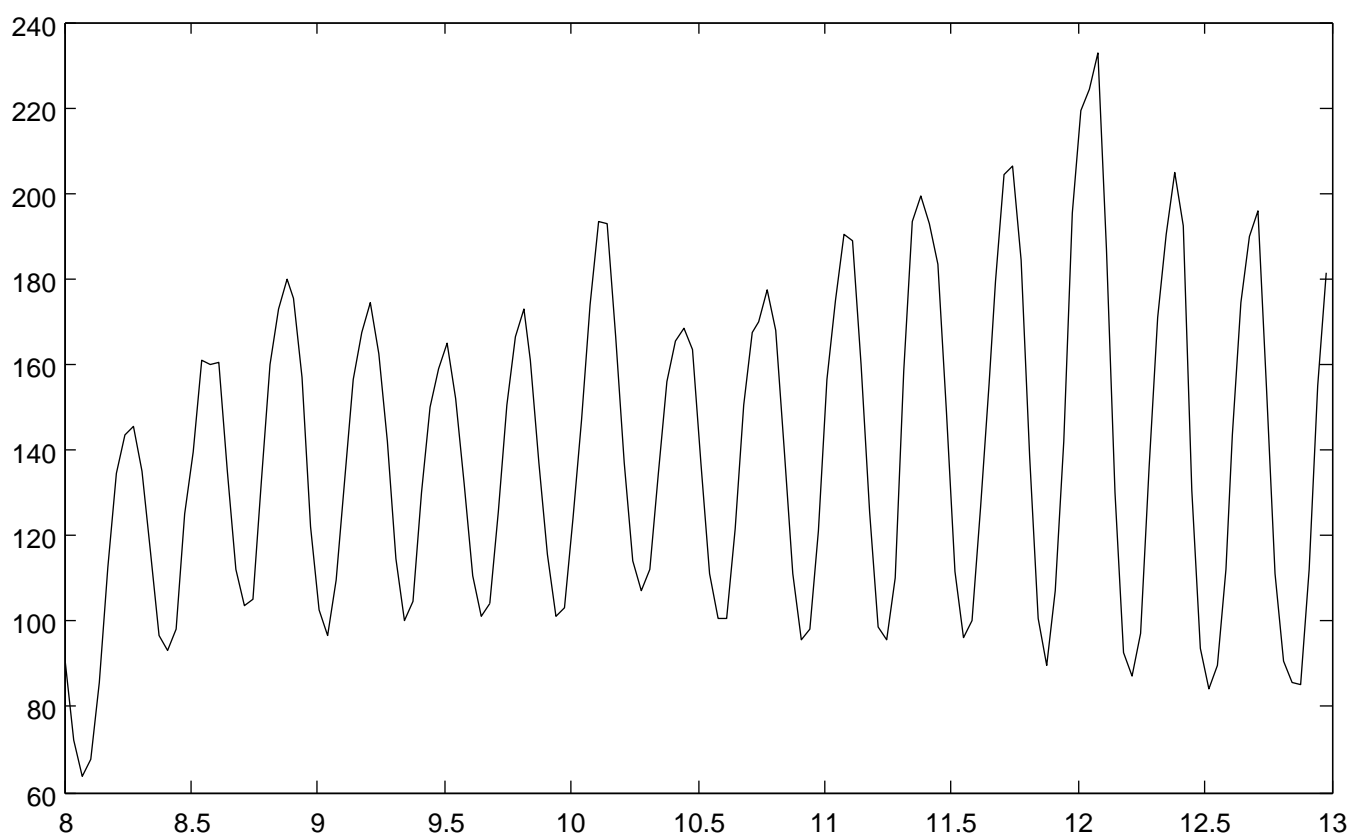

Supplement: Data_Sheet_2.ZIP [file Data_Sheet_2.ZIP]

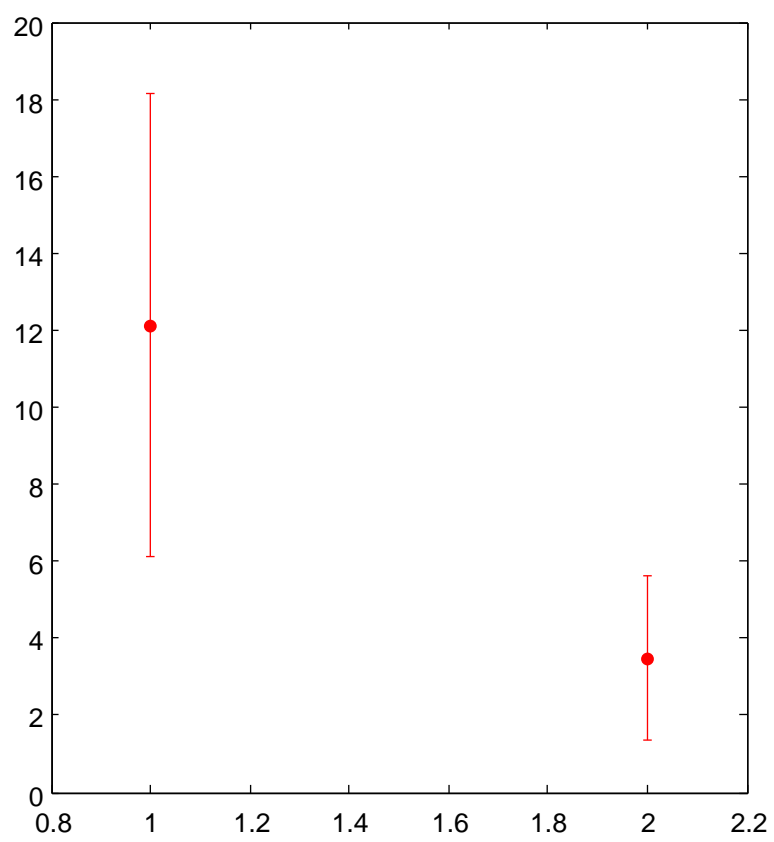

Supplement: Data_Sheet_2.ZIP [file Data_Sheet_2.ZIP]

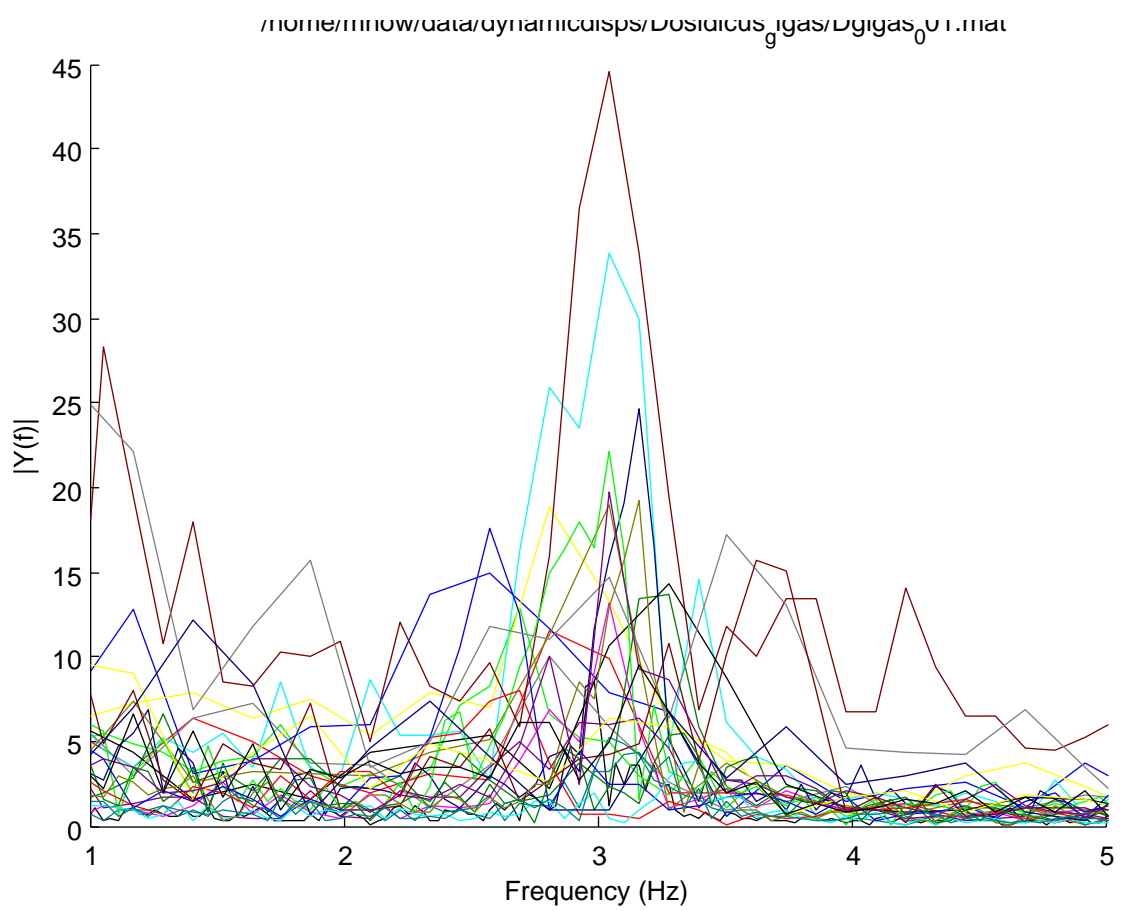

Supplement: Data_Sheet_2.ZIP [file Data_Sheet_2.ZIP]

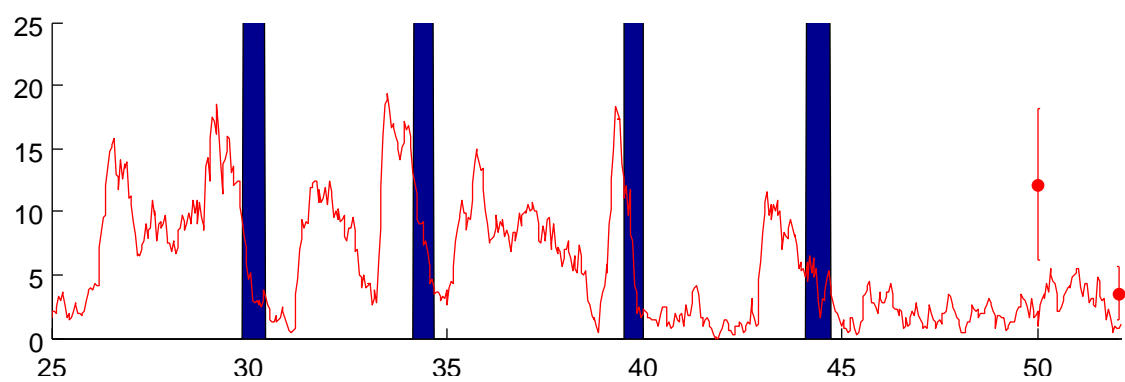

Supplement: Data_Sheet_2.ZIP [file Data_Sheet_2.ZIP]

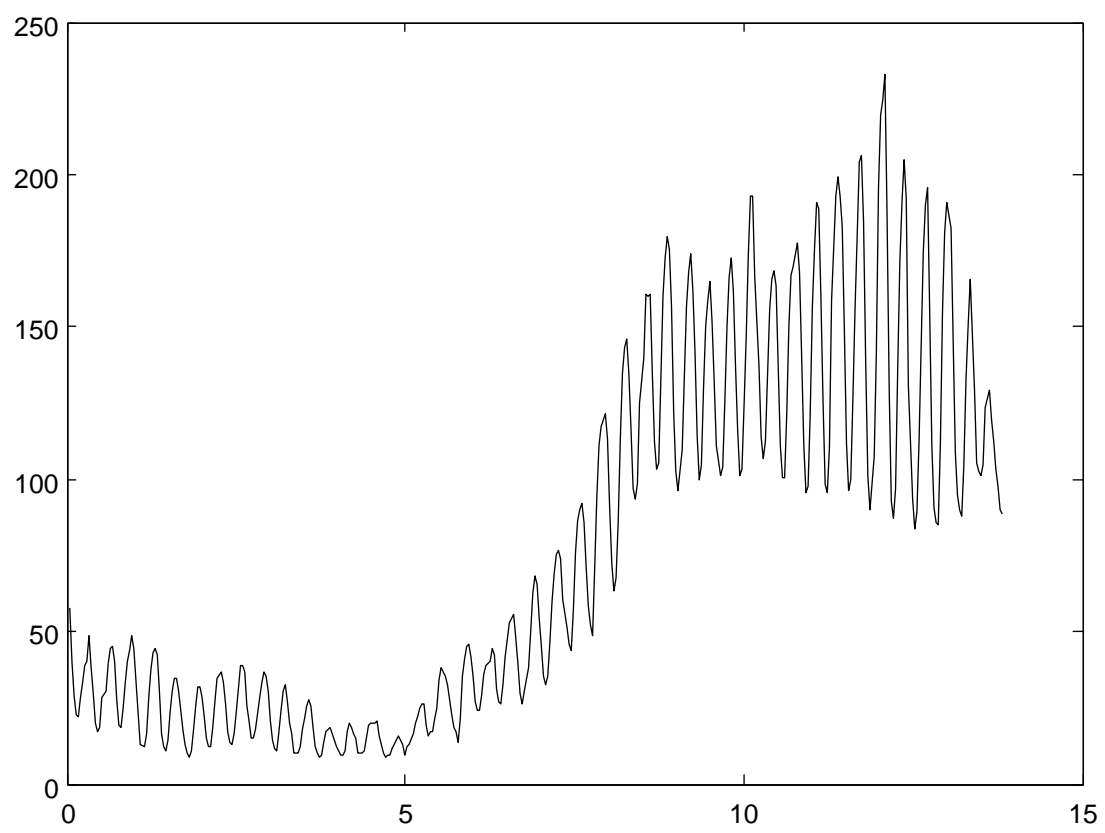

Supplement: Data_Sheet_2.ZIP [file Data_Sheet_2.ZIP]

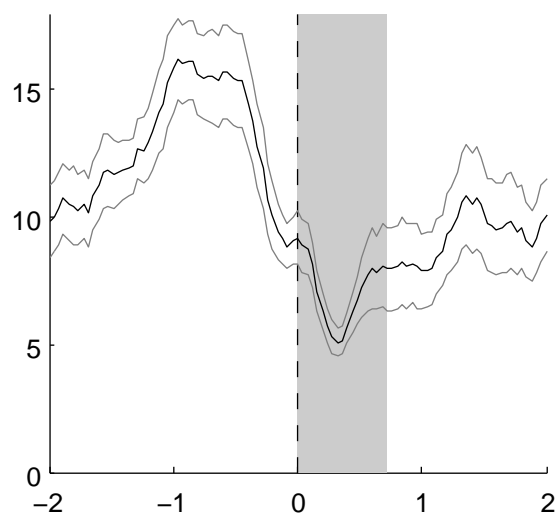

Supplement: Data_Sheet_2.ZIP [file Data_Sheet_2.ZIP]
